# Supplementary material for: Evaluating Wastewater Quality Parameters as an Alternative or Complement to Molecular Indicators for Normalization during SARS-CoV-2 Wastewater-Based Epidemiology
Source: MDPI journal article supplement (doi:10.3390/environments11040080), 2024-04-12
Supplement: s1 [file s1]

# **Evaluating Wastewater Quality Parameters as an Alternative or Complement to Molecular Indicators for Normalization during SARS-CoV-2 Wastewater-Based Epidemiology**

**Judith Straathof<sup>1</sup> and Natalie M. Hull<sup>1,2,\*</sup>**

<sup>1</sup> Department of Civil, Environmental, and Geodetic Engineering, The Ohio State University, Columbus, OH 43210, USA; straathof.1@buckeyemail.osu.edu

<sup>2</sup> Sustainability Institute, The Ohio State University, Columbus, OH 43210, USA

\* Correspondence: hull.305@osu.edu or nataliehull@boisestate.edu

## **Contents:**

Table S1: UV absorbance ratios

Table S2: Average wastewater parameters for the six campus sites

Equations S1-S128: Normalizations of SARS-CoV-2 gene concentration

Table S3: Spearman's  $\rho$  for SARS-CoV-2 N1 and N2 and COVID-19 cases for all WWTs pooled together

Table S4: Spearman's  $\rho$  for SARS-CoV-2 N1 and N2 and COVID-19 cases for Beavercreek WRRF

Table S5: Spearman's  $\rho$  for SARS-CoV-2 N1 and N2 and COVID-19 cases for Eaton WTP

Table S6: Spearman's  $\rho$  for SARS-CoV-2 N1 and N2 and COVID-19 cases for Greenville WTP

Table S6: Spearman's  $\rho$  for SARS-CoV-2 N1 and N2 and COVID-19 cases for Oxford WTP

Table S8: Spearman's  $\rho$  for SARS-CoV-2 N1 and N2 and COVID-19 cases for Tri-Cities NR WTP

Table S9: Spearman's  $\rho$  for SARS-CoV-2 N1,N2, and E and COVID-19 cases for the campus data

Table S10: Spearman's  $\rho$  for PMMoV normalized SARS-CoV-2 N1,N2, and E and COVID-19 cases for the campus data

**Table S1.** Sample light absorbance ratios used to evaluate DOC properties. References are listed in manuscript, numbers 52 – 59

| <b>Ratios</b> | <b>Wavelengths</b> | <b>Reference</b>                        |
|---------------|--------------------|-----------------------------------------|
| E2 : E3       | 250 : 365          | (Peuravuori & Pihlaja, 1997)            |
| aE2 : E4      | 252 : 452          | (Graham, Gavin, Kirika, & Farmer, 2021) |
| bE2 : E4      | 254 : 436          | (Selberg, Viik, Ehapalu, & Tenno, 2011) |
| cE2 : E4      | 254 : 465          | (Park, Joe, Han, & Kim, 1999)           |
| aE4 : E6      | 400 : 600          | (Moore, 1987)                           |
| bE4 : E6      | 450 : 650          | (Wilson, et al., 2011)                  |
| cE4 : E6      | 460 : 660          | (Thurman, 1985)                         |
| dE4 : E6      | 465 : 665          | (Wallage, Holden, & McDonald, 2006)     |

**Table S2.** Average wastewater parameters for the six campus sites during the study + standard deviations.

| Site | Total Coliforms<br>(CFU/mL) | <i>E.coli</i> (CFU/mL) | ORP (mV)         | Electrical<br>conductivity<br>( $\mu$ S/cm) | Absolute EC<br>( $\mu$ S/cm) | Resistivity<br>( $K\Omega \cdot \text{cm}$ ) | TDS (ppt)       | Salinity<br>(PSU) |
|------|-----------------------------|------------------------|------------------|---------------------------------------------|------------------------------|----------------------------------------------|-----------------|-------------------|
| 1    | 29511 $\pm$ 26869           | 8255 $\pm$ 8441        | 115 $\pm$ 83.8   | 837 $\pm$ 435                               | 802 $\pm$ 382                | 1.41 $\pm$ 0.53                              | 0.41 $\pm$ 0.21 | 0.41 $\pm$ 0.22   |
| 2    | 340231 $\pm$ 235813         | 42779 $\pm$ 34991      | 39.7 $\pm$ 75.7  | 685 $\pm$ 145                               | 660 $\pm$ 152                | 1.54 $\pm$ 0.47                              | 0.34 $\pm$ 0.07 | 0.33 $\pm$ 0.07   |
| 3    | 108982 $\pm$ 80743          | 16684 $\pm$ 20226      | 58.3 $\pm$ 93.0  | 628 $\pm$ 121                               | 596 $\pm$ 99.9               | 1.64 $\pm$ 0.30                              | 0.31 $\pm$ 0.06 | 0.30 $\pm$ 0.06   |
| 4    | 160797 $\pm$ 121079         | 39003 $\pm$ 28506      | 40.4 $\pm$ 53.6  | 712 $\pm$ 145                               | 672 $\pm$ 114                | 1.45 $\pm$ 0.26                              | 0.35 $\pm$ 0.07 | 0.34 $\pm$ 0.07   |
| 5    | 751499 $\pm$ 1490024        | 97734 $\pm$ 226839     | -13.5 $\pm$ 140. | 649 $\pm$ 234                               | 646 $\pm$ 232                | 1.75 $\pm$ 0.72                              | 0.32 $\pm$ 0.11 | 0.31 $\pm$ 0.11   |
| 6    | 60069 $\pm$ 43219           | 23689 $\pm$ 30747      | 72.0 $\pm$ 61.5  | 644 $\pm$ 68.6                              | 604 $\pm$ 49.1               | 1.56 $\pm$ 0.16                              | 0.32 $\pm$ 0.03 | 0.31 $\pm$ 0.03   |

|         |                                                |
|---------|------------------------------------------------|
| Eq. S1  | SARS-CoV-2                                     |
| Eq. S2  | SARS-CoV-2/pH                                  |
| Eq. S3  | SARS-CoV-2/Temperature_MIN                     |
| Eq. S4  | SARS-CoV-2/Temperature_MAX                     |
| Eq. S5  | SARS-CoV-2/Temperature_AVG                     |
| Eq. S6  | SARS-CoV-2/Total Suspended Solids              |
| Eq. S7  | SARS-CoV-2*pH                                  |
| Eq. S8  | SARS-CoV-2*Temperature_MIN                     |
| Eq. S9  | SARS-CoV-2*Temperature_MAX                     |
| Eq. S10 | SARS-CoV-2*Temperature_AVG                     |
| Eq. S11 | SARS-CoV-2*Total Suspended Solids              |
| Eq. S12 | SARS-CoV-2*Flow                                |
| Eq. S13 | SARS-CoV-2*Flow/pH                             |
| Eq. S14 | SARS-CoV-2*Flow/Temperature_MIN                |
| Eq. S15 | SARS-CoV-2*Flow/Temperature_MAX                |
| Eq. S16 | SARS-CoV-2*Flow/Temperature_AVG                |
| Eq. S17 | SARS-CoV-2*Flow/Total Suspended Solids         |
| Eq. S18 | SARS-CoV-2*Flow*pH                             |
| Eq. S19 | SARS-CoV-2*Flow*Temperature_MIN                |
| Eq. S20 | SARS-CoV-2*Flow*Temperature_MAX                |
| Eq. S21 | SARS-CoV-2*Flow*Temperature_AVG                |
| Eq. S22 | SARS-CoV-2*Flow*Total Suspended Solids         |
| Eq. S23 | (SARS-CoV-2/PMMoV)                             |
| Eq. S24 | (SARS-CoV-2/PMMoV)/pH                          |
| Eq. S25 | (SARS-CoV-2/PMMoV)/Temperature_MIN             |
| Eq. S26 | (SARS-CoV-2/PMMoV)/Temperature_MAX             |
| Eq. S27 | (SARS-CoV-2/PMMoV)/Temperature_AVG             |
| Eq. S28 | (SARS-CoV-2/PMMoV)/Total Suspended Solids      |
| Eq. S29 | (SARS-CoV-2/PMMoV)*pH                          |
| Eq. S30 | (SARS-CoV-2/PMMoV)*Temperature_MIN             |
| Eq. S31 | (SARS-CoV-2/PMMoV)*Temperature_MAX             |
| Eq. S32 | (SARS-CoV-2/PMMoV)*Temperature_AVG             |
| Eq. S33 | (SARS-CoV-2/PMMoV)*Total Suspended Solids      |
| Eq. S34 | (SARS-CoV-2/PMMoV)*Flow                        |
| Eq. S35 | (SARS-CoV-2/PMMoV)*Flow/pH                     |
| Eq. S36 | (SARS-CoV-2/PMMoV)*Flow/Temperature_MIN        |
| Eq. S37 | (SARS-CoV-2/PMMoV)*Flow/Temperature_MAX        |
| Eq. S38 | (SARS-CoV-2/PMMoV)*Flow/Temperature_AVG        |
| Eq. S39 | (SARS-CoV-2/PMMoV)*Flow/Total Suspended Solids |
| Eq. S40 | (SARS-CoV-2/PMMoV)*Flow*pH                     |
| Eq. S41 | (SARS-CoV-2/PMMoV)*Flow*Temperature_MIN        |
| Eq. S42 | (SARS-CoV-2/PMMoV)*Flow*Temperature_MAX        |
| Eq. S43 | (SARS-CoV-2/PMMoV)*Flow*Temperature_AVG        |
| Eq. S44 | (SARS-CoV-2/PMMoV)*Flow*Total Suspended Solids |

|         |                            |          |                                    |
|---------|----------------------------|----------|------------------------------------|
| Eq. S45 | SARS-CoV-2/Turbidity       | Eq. S87  | (SARS-CoV-2/PMMoV)/Turbidity       |
| Eq. S46 | SARS-CoV-2/DOC             | Eq. S88  | (SARS-CoV-2/PMMoV)/DOC             |
| Eq. S47 | SARS-CoV-2/Total Coliforms | Eq. S89  | (SARS-CoV-2/PMMoV)/Total Coliforms |
| Eq. S48 | SARS-CoV-2/ <i>E. coli</i> | Eq. S90  | (SARS-CoV-2/PMMoV)/ <i>E. coli</i> |
| Eq. S49 | SARS-CoV-2/mV_pH           | Eq. S91  | (SARS-CoV-2/PMMoV)/mV_pH           |
| Eq. S50 | SARS-CoV-2/ORP_mV          | Eq. S92  | (SARS-CoV-2/PMMoV)/ORP_mV          |
| Eq. S51 | SARS-CoV-2/EC              | Eq. S93  | (SARS-CoV-2/PMMoV)/EC              |
| Eq. S52 | SARS-CoV-2/EC_Abs          | Eq. S94  | (SARS-CoV-2/PMMoV)/EC_Abs          |
| Eq. S53 | SARS-CoV-2/Resistivity     | Eq. S95  | (SARS-CoV-2/PMMoV)/Resistivity     |
| Eq. S54 | SARS-CoV-2/Pressure        | Eq. S96  | (SARS-CoV-2/PMMoV)/Pressure        |
| Eq. S55 | SARS-CoV-2*Turbidity       | Eq. S97  | (SARS-CoV-2/PMMoV)*Turbidity       |
| Eq. S56 | SARS-CoV-2*DOC             | Eq. S98  | (SARS-CoV-2/PMMoV)*DOC             |
| Eq. S57 | SARS-CoV-2*Total Coliforms | Eq. S99  | (SARS-CoV-2/PMMoV)*Total Coliforms |
| Eq. S58 | SARS-CoV-2* <i>E. coli</i> | Eq. S100 | (SARS-CoV-2/PMMoV)* <i>E. coli</i> |
| Eq. S59 | SARS-CoV-2*mV_pH           | Eq. S101 | (SARS-CoV-2/PMMoV)*mV_pH           |
| Eq. S60 | SARS-CoV-2*ORP_mV          | Eq. S102 | (SARS-CoV-2/PMMoV)*ORP_mV          |
| Eq. S61 | SARS-CoV-2*EC              | Eq. S103 | (SARS-CoV-2/PMMoV)*EC              |
| Eq. S62 | SARS-CoV-2*EC_Abs          | Eq. S104 | (SARS-CoV-2/PMMoV)*EC_Abs          |
| Eq. S63 | SARS-CoV-2*Resistivity     | Eq. S105 | (SARS-CoV-2/PMMoV)*Resistivity     |
| Eq. S64 | SARS-CoV-2*Pressure        | Eq. S106 | (SARS-CoV-2/PMMoV)*Pressure        |
| Eq. S65 | SARS-CoV-2/(E2:E3)         | Eq. S107 | (SARS-CoV-2/PMMoV)/(E2:E3)         |
| Eq. S66 | SARS-CoV-2/(aE2:E4)        | Eq. S108 | (SARS-CoV-2/PMMoV)/(aE2:E4)        |
| Eq. S67 | SARS-CoV-2/(bE2:E4)        | Eq. S109 | (SARS-CoV-2/PMMoV)/(bE2:E4)        |
| Eq. S68 | SARS-CoV-2/(cE2:E4)        | Eq. S110 | (SARS-CoV-2/PMMoV)/(cE2:E4)        |
| Eq. S69 | SARS-CoV-2/(aE4:E6)        | Eq. S111 | (SARS-CoV-2/PMMoV)/(aE4:E6)        |
| Eq. S70 | SARS-CoV-2/(bE4:E6)        | Eq. S112 | (SARS-CoV-2/PMMoV)/(bE4:E6)        |
| Eq. S71 | SARS-CoV-2/(cE4:E6)        | Eq. S113 | (SARS-CoV-2/PMMoV)/(cE4:E6)        |
| Eq. S72 | SARS-CoV-2/(dE4:E6)        | Eq. S114 | (SARS-CoV-2/PMMoV)/(dE4:E6)        |
| Eq. S73 | SARS-CoV-2/SUVA254         | Eq. S115 | (SARS-CoV-2/PMMoV)/SUVA254         |
| Eq. S74 | SARS-CoV-2/SUVA280         | Eq. S116 | (SARS-CoV-2/PMMoV)/SUVA280         |
| Eq. S75 | SARS-CoV-2/SUVA400         | Eq. S117 | (SARS-CoV-2/PMMoV)/SUVA400         |
| Eq. S76 | SARS-CoV-2*(E2:E3)         | Eq. S118 | (SARS-CoV-2/PMMoV)*(E2:E3)         |
| Eq. S77 | SARS-CoV-2*(aE2:E4)        | Eq. S119 | (SARS-CoV-2/PMMoV)*(aE2:E4)        |
| Eq. S78 | SARS-CoV-2*(bE2:E4)        | Eq. S120 | (SARS-CoV-2/PMMoV)*(bE2:E4)        |
| Eq. S79 | SARS-CoV-2*(cE2:E4)        | Eq. S121 | (SARS-CoV-2/PMMoV)*(cE2:E4)        |
| Eq. S80 | SARS-CoV-2*(aE4:E6)        | Eq. S122 | (SARS-CoV-2/PMMoV)*(aE4:E6)        |
| Eq. S81 | SARS-CoV-2*(bE4:E6)        | Eq. S123 | (SARS-CoV-2/PMMoV)*(bE4:E6)        |
| Eq. S82 | SARS-CoV-2*(cE4:E6)        | Eq. S124 | (SARS-CoV-2/PMMoV)*(cE4:E6)        |
| Eq. S83 | SARS-CoV-2*(dE4:E6)        | Eq. S125 | (SARS-CoV-2/PMMoV)*(dE4:E6)        |
| Eq. S84 | SARS-CoV-2*SUVA254         | Eq. S126 | (SARS-CoV-2/PMMoV)*SUVA254         |
| Eq. S85 | SARS-CoV-2*SUVA280         | Eq. S127 | (SARS-CoV-2/PMMoV)*SUVA280         |
| Eq. S86 | SARS-CoV-2*SUVA400         | Eq. S128 | (SARS-CoV-2/PMMoV)*SUVA400         |

**Table S3.** Spearman's  $\rho$  correlation coefficients between SARS-CoV-2 N1 and N2 gene concentrations and COVID-19 cases for all five wastewater treatment plants pooled together. Significant Spearman's  $\rho$  correlation coefficients are highlighted in gray. Stars (\*) denote when the difference in Spearman's  $\rho$  between unnormalized and normalized SARS-CoV-2 is significant. Table continues to next page.

| Variable                | N1    |                        |                  |                                   | N2    |                        |                  |                                   |
|-------------------------|-------|------------------------|------------------|-----------------------------------|-------|------------------------|------------------|-----------------------------------|
|                         | Cases | 7-Day M. Avg. of Cases | Pop. Norm. Cases | 7-Day M. Avg. of Pop. Norm. Cases | Cases | 7-Day M. Avg. of Cases | Pop. Norm. Cases | 7-Day M. Avg. of Pop. Norm. Cases |
| SARS-CoV-2              | 0.54  | 0.59                   | 0.61             | 0.69                              | 0.52  | 0.57                   | 0.60             | 0.68                              |
| SARS-CoV-2/pH           | 0.56  | 0.60                   | 0.62             | 0.69                              | 0.54  | 0.59                   | 0.61             | 0.68                              |
| SARS-CoV-2/TMIN         | 0.57  | 0.61                   | 0.64             | 0.70                              | 0.56  | 0.61                   | 0.64             | 0.70                              |
| SARS-CoV-2/TMAX         | 0.57  | 0.62                   | 0.64             | 0.70                              | 0.57  | 0.62                   | 0.63             | 0.70                              |
| SARS-CoV-2/TAVG         | 0.55  | 0.60                   | 0.62             | 0.69                              | 0.54  | 0.59                   | 0.63             | 0.69                              |
| SARS-CoV-2/TSS          | 0.55  | 0.61                   | 0.60             | 0.67                              | 0.54  | 0.59                   | 0.59             | 0.66                              |
| SARS-CoV-2*pH           | 0.53  | 0.57                   | 0.61             | 0.68                              | 0.50  | 0.55                   | 0.60             | 0.67                              |
| SARS-CoV-2*TMIN         | 0.58  | 0.61                   | 0.63             | 0.68                              | 0.55  | 0.59                   | 0.61             | 0.66                              |
| SARS-CoV-2*TMAX         | 0.57  | 0.61                   | 0.63             | 0.68                              | 0.55  | 0.59                   | 0.61             | 0.66                              |
| SARS-CoV-2*TAVG         | 0.55  | 0.58                   | 0.61             | 0.67                              | 0.52  | 0.56                   | 0.60             | 0.66                              |
| SARS-CoV-2*TSS          | 0.56  | 0.58                   | 0.62             | 0.66                              | 0.56  | 0.59                   | 0.63             | 0.68                              |
| SARS-CoV-2*Flow         | 0.66* | 0.71*                  | 0.59             | 0.64                              | 0.64  | 0.69                   | 0.60             | 0.66                              |
| SARS-CoV-2*Flow/pH      | 0.66* | 0.71*                  | 0.59             | 0.64                              | 0.64  | 0.69                   | 0.60             | 0.66                              |
| SARS-CoV-2*Flow/TMIN    | 0.66* | 0.71*                  | 0.62             | 0.68                              | 0.64  | 0.70                   | 0.62             | 0.69                              |
| SARS-CoV-2*Flow/TMAX    | 0.66* | 0.71*                  | 0.61             | 0.68                              | 0.64  | 0.70                   | 0.62             | 0.69                              |
| SARS-CoV-2*Flow/TAVG    | 0.65  | 0.70*                  | 0.59             | 0.65                              | 0.64  | 0.69                   | 0.60             | 0.66                              |
| SARS-CoV-2*Flow/TSS     | 0.62  | 0.68                   | 0.58             | 0.65                              | 0.61  | 0.67                   | 0.58             | 0.65                              |
| SARS-CoV-2*Flow*pH      | 0.65  | 0.70*                  | 0.59             | 0.65                              | 0.63  | 0.69                   | 0.60             | 0.66                              |
| SARS-CoV-2*Flow*TMIN    | 0.67* | 0.71*                  | 0.61             | 0.67                              | 0.65  | 0.70                   | 0.62             | 0.67                              |
| SARS-CoV-2*Flow*TMAX    | 0.67* | 0.71*                  | 0.62             | 0.67                              | 0.65  | 0.70                   | 0.62             | 0.68                              |
| SARS-CoV-2*Flow*TAVG    | 0.66* | 0.70*                  | 0.59             | 0.64                              | 0.64  | 0.69                   | 0.60             | 0.66                              |
| SARS-CoV-2*Flow*TSS     | 0.66* | 0.70*                  | 0.62             | 0.66                              | 0.67  | 0.71                   | 0.63             | 0.68                              |
| (SARS-CoV-2/PMMoV)      | 0.34* | 0.37*                  | 0.43*            | 0.49*                             | 0.33* | 0.36*                  | 0.44*            | 0.50*                             |
| (SARS-CoV-2/PMMoV)/pH   | 0.34* | 0.40*                  | 0.23*            | 0.27*                             | 0.34* | 0.37*                  | 0.44*            | 0.50*                             |
| (SARS-CoV-2/PMMoV)/TMIN | 0.35* | 0.40*                  | 0.23*            | 0.26*                             | 0.39  | 0.42*                  | 0.46*            | 0.50*                             |
| (SARS-CoV-2/PMMoV)/TMAX | 0.35* | 0.40*                  | 0.23*            | 0.26*                             | 0.39  | 0.42*                  | 0.46*            | 0.50*                             |
| (SARS-CoV-2/PMMoV)/TAVG | 0.34* | 0.40*                  | 0.23*            | 0.27*                             | 0.35* | 0.38*                  | 0.46*            | 0.51*                             |
| (SARS-CoV-2/PMMoV)/TSS  | 0.34* | 0.39*                  | 0.21*            | 0.25*                             | 0.36* | 0.40*                  | 0.42*            | 0.47*                             |
| (SARS-CoV-2/PMMoV)*pH   | 0.33* | 0.36*                  | 0.43*            | 0.49*                             | 0.328 | 0.36*                  | 0.44*            | 0.50*                             |
| (SARS-CoV-2/PMMoV)*TMIN | 0.38* | 0.40*                  | 0.43*            | 0.46*                             | 0.39  | 0.41*                  | 0.44*            | 0.48*                             |
| (SARS-CoV-2/PMMoV)*TMAX | 0.38* | 0.40*                  | 0.43*            | 0.46*                             | 0.39  | 0.40*                  | 0.45*            | 0.48*                             |
| (SARS-CoV-2/PMMoV)*TAVG | 0.34* | 0.36*                  | 0.42*            | 0.47*                             | 0.34* | 0.36*                  | 0.44*            | 0.49*                             |
| (SARS-CoV-2/PMMoV)*TSS  | 0.38* | 0.38*                  | 0.43*            | 0.45*                             | 0.39  | 0.40*                  | 0.46*            | 0.48*                             |
| (SARS-CoV-2/PMMoV)*Flow | 0.47  | 0.50                   | 0.43*            | 0.47*                             | 0.46  | 0.49                   | 0.45*            | 0.49*                             |

|                              |      |      |       |       |      |      |       |       |
|------------------------------|------|------|-------|-------|------|------|-------|-------|
| (SARS-CoV-2/PMMoV)*Flow/pH   | 0.47 | 0.50 | 0.42* | 0.47* | 0.46 | 0.49 | 0.44* | 0.49* |
| (SARS-CoV-2/PMMoV)*Flow/TMIN | 0.48 | 0.51 | 0.44* | 0.48* | 0.48 | 0.51 | 0.46* | 0.50* |
| (SARS-CoV-2/PMMoV)*Flow/TMAX | 0.48 | 0.51 | 0.44* | 0.48* | 0.48 | 0.51 | 0.46* | 0.50* |
| (SARS-CoV-2/PMMoV)*Flow/TAVG | 0.47 | 0.50 | 0.43* | 0.48* | 0.46 | 0.50 | 0.45* | 0.50* |
| (SARS-CoV-2/PMMoV)*Flow/TSS  | 0.45 | 0.48 | 0.41* | 0.45* | 0.44 | 0.48 | 0.42* | 0.47* |
| (SARS-CoV-2/PMMoV)*Flow*pH   | 0.46 | 0.49 | 0.43* | 0.47* | 0.45 | 0.49 | 0.45* | 0.50* |
| (SARS-CoV-2/PMMoV)*Flow*TMIN | 0.48 | 0.49 | 0.43* | 0.46* | 0.48 | 0.50 | 0.45* | 0.48* |
| (SARS-CoV-2/PMMoV)*Flow*TMAX | 0.48 | 0.49 | 0.43* | 0.46* | 0.48 | 0.50 | 0.45* | 0.48* |
| (SARS-CoV-2/PMMoV)*Flow*TAVG | 0.46 | 0.48 | 0.42* | 0.46* | 0.46 | 0.49 | 0.44* | 0.49* |
| (SARS-CoV-2/PMMoV)*Flow*TSS  | 0.48 | 0.49 | 0.44* | 0.45* | 0.49 | 0.50 | 0.46* | 0.49* |

**Table S4.** Spearman's  $\rho$  correlation coefficients between SARS-CoV-2 N1 and N2 gene concentrations and COVID-19 cases for Beavercreek WRRF. Significant Spearman's  $\rho$  correlation coefficients are highlighted in gray. Stars (\*) denote when the difference in Spearman's  $\rho$  between unnormalized and normalized SARS-CoV-2 is significant. Table continues to next page.

| Variable                   | N1                     | N2                     |
|----------------------------|------------------------|------------------------|
|                            | 7-Day M. Avg. of Cases | 7-Day M. Avg. of Cases |
| SARS-CoV-2                 | 0.74                   | 0.73                   |
| SARS-CoV-2/pH              | 0.74                   | 0.72                   |
| SARS-CoV-2/TMIN            | 0.71                   | 0.72                   |
| SARS-CoV-2/TMAX            | 0.71                   | 0.72                   |
| SARS-CoV-2/TAVG            | 0.71                   | 0.72                   |
| SARS-CoV-2/TSS             | 0.71                   | 0.70                   |
| SARS-CoV-2*pH              | 0.74                   | 0.72                   |
| SARS-CoV-2*TMIN            | 0.76                   | 0.72                   |
| SARS-CoV-2*TMAX            | 0.77                   | 0.72                   |
| SARS-CoV-2*TAVG            | 0.76                   | 0.72                   |
| SARS-CoV-2*TSS             | 0.72                   | 0.71                   |
| SARS-CoV-2*Flow            | 0.73                   | 0.72                   |
| SARS-CoV-2*Flow/pH         | 0.73                   | 0.72                   |
| SARS-CoV-2*Flow/TMIN       | 0.70                   | 0.70                   |
| SARS-CoV-2*Flow/TMAX       | 0.70                   | 0.70                   |
| SARS-CoV-2*Flow/TAVG       | 0.70                   | 0.70                   |
| SARS-CoV-2*Flow/TSS        | 0.69                   | 0.68                   |
| SARS-CoV-2*Flow*pH         | 0.73                   | 0.72                   |
| SARS-CoV-2*Flow*TMIN       | 0.75                   | 0.72                   |
| SARS-CoV-2*Flow*TMAX       | 0.76                   | 0.72                   |
| SARS-CoV-2*Flow*TAVG       | 0.75                   | 0.72                   |
| SARS-CoV-2*Flow*TSS        | 0.72                   | 0.71                   |
| (SARS-CoV-2/PMMoV)         | 0.52*                  | 0.52*                  |
| (SARS-CoV-2/PMMoV)/pH      | 0.52*                  | 0.51*                  |
| (SARS-CoV-2/PMMoV)/TMIN    | 0.51*                  | 0.51*                  |
| (SARS-CoV-2/PMMoV)/TMAX    | 0.51*                  | 0.51*                  |
| (SARS-CoV-2/PMMoV)/TAVG    | 0.51*                  | 0.51*                  |
| (SARS-CoV-2/PMMoV)/TSS     | 0.50*                  | 0.50*                  |
| (SARS-CoV-2/PMMoV)*pH      | 0.53*                  | 0.52*                  |
| (SARS-CoV-2/PMMoV)*TMIN    | 0.53*                  | 0.52*                  |
| (SARS-CoV-2/PMMoV)*TMAX    | 0.54*                  | 0.52*                  |
| (SARS-CoV-2/PMMoV)*TAVG    | 0.54*                  | 0.52*                  |
| (SARS-CoV-2/PMMoV)*TSS     | 0.50*                  | 0.49*                  |
| (SARS-CoV-2/PMMoV)*Flow    | 0.50*                  | 0.50*                  |
| (SARS-CoV-2/PMMoV)*Flow/pH | 0.50*                  | 0.49*                  |



|                              |       |       |
|------------------------------|-------|-------|
| (SARS-CoV-2/PMMoV)*Flow/TMIN | 0.48* | 0.49* |
| (SARS-CoV-2/PMMoV)*Flow/TMAX | 0.48* | 0.49* |
| (SARS-CoV-2/PMMoV)*Flow/TAVG | 0.48* | 0.49* |
| (SARS-CoV-2/PMMoV)*Flow/TSS  | 0.47* | 0.47* |
| (SARS-CoV-2/PMMoV)*Flow*pH   | 0.50* | 0.50* |
| (SARS-CoV-2/PMMoV)*Flow*TMIN | 0.51* | 0.50* |
| (SARS-CoV-2/PMMoV)*Flow*TMAX | 0.51* | 0.50* |
| (SARS-CoV-2/PMMoV)*Flow*TAVG | 0.51* | 0.50* |
| (SARS-CoV-2/PMMoV)*Flow*TSS  | 0.49* | 0.48* |

**Table S5.** Spearman's  $\rho$  correlation coefficients between SARS-CoV-2 N1 and N2 gene concentrations and COVID-19 cases for Eaton WTP. Significant Spearman's  $\rho$  correlation coefficients are highlighted in gray. Stars (\*) denote when the difference in Spearman's  $\rho$  between unnormalized and normalized SARS-CoV-2 is significant.

| Variable                     | N1                     | N2                     |
|------------------------------|------------------------|------------------------|
|                              | 7-Day M. Avg. of Cases | 7-Day M. Avg. of Cases |
| SARS-CoV-2                   | 0.51                   | 0.46                   |
| SARS-CoV-2/pH                | 0.54                   | 0.50                   |
| SARS-CoV-2/TAVG              | 0.53                   | 0.52                   |
| SARS-CoV-2*pH                | 0.52                   | 0.47                   |
| SARS-CoV-2*TAVG              | 0.51                   | 0.52                   |
| SARS-CoV-2*Flow              | 0.48                   | 0.43                   |
| SARS-CoV-2*Flow/pH           | 0.47                   | 0.45                   |
| SARS-CoV-2*Flow/TAVG         | 0.48                   | 0.49                   |
| SARS-CoV-2*Flow*pH           | 0.46                   | 0.44                   |
| SARS-CoV-2*Flow*TAVG         | 0.45                   | 0.48                   |
| (SARS-CoV-2/PMMoV)           | 0.55                   | 0.52                   |
| (SARS-CoV-2/PMMoV)/pH        | 0.53                   | 0.51                   |
| (SARS-CoV-2/PMMoV)/TAVG      | 0.53                   | 0.52                   |
| (SARS-CoV-2/PMMoV)*pH        | 0.53                   | 0.50                   |
| (SARS-CoV-2/PMMoV)*TAVG      | 0.52                   | 0.51                   |
| (SARS-CoV-2/PMMoV)*Flow      | 0.52                   | 0.47                   |
| (SARS-CoV-2/PMMoV)*Flow/pH   | 0.51                   | 0.48                   |
| (SARS-CoV-2/PMMoV)*Flow/TAVG | 0.50                   | 0.52                   |
| (SARS-CoV-2/PMMoV)*Flow*pH   | 0.49                   | 0.45                   |
| (SARS-CoV-2/PMMoV)*Flow*TAVG | 0.52                   | 0.51                   |

**Table S6.** Spearman's  $\rho$  correlation coefficients between SARS-CoV-2 N1 and N2 gene concentrations and COVID-19 cases for Greenville WTP. Significant Spearman's  $\rho$  correlation coefficients are highlighted in gray. Stars (\*) denote when the difference in Spearman's  $\rho$  between unnormalized and normalized SARS-CoV-2 is significant. Table continues to next page.

| Variable                     | N1                     | N2                     |
|------------------------------|------------------------|------------------------|
|                              | 7-Day M. Avg. of Cases | 7-Day M. Avg. of Cases |
| SARS-CoV-2                   | 0.72                   | 0.69                   |
| SARS-CoV-2/pH                | 0.72                   | 0.68                   |
| SARS-CoV-2/TMIN              | 0.75                   | 0.71                   |
| SARS-CoV-2/TMAX              | 0.74                   | 0.71                   |
| SARS-CoV-2/TAVG              | 0.74                   | 0.71                   |
| SARS-CoV-2/TSS               | 0.74                   | 0.69                   |
| SARS-CoV-2*pH                | 0.72                   | 0.68                   |
| SARS-CoV-2*TMIN              | 0.68                   | 0.65                   |
| SARS-CoV-2*TMAX              | 0.69                   | 0.66                   |
| SARS-CoV-2*TAVG              | 0.69                   | 0.65                   |
| SARS-CoV-2*TSS               | 0.69                   | 0.68                   |
| SARS-CoV-2*Flow              | 0.74                   | 0.69                   |
| SARS-CoV-2*Flow/pH           | 0.74                   | 0.69                   |
| SARS-CoV-2*Flow/TMIN         | 0.75                   | 0.71                   |
| SARS-CoV-2*Flow/TMAX         | 0.75                   | 0.71                   |
| SARS-CoV-2*Flow/TAVG         | 0.75                   | 0.71                   |
| SARS-CoV-2*Flow/TSS          | 0.76                   | 0.69                   |
| SARS-CoV-2*Flow*pH           | 0.74                   | 0.69                   |
| SARS-CoV-2*Flow*TMIN         | 0.72                   | 0.67                   |
| SARS-CoV-2*Flow*TMAX         | 0.72                   | 0.67                   |
| SARS-CoV-2*Flow*TAVG         | 0.72                   | 0.67                   |
| SARS-CoV-2*Flow*TSS          | 0.70                   | 0.67                   |
| (SARS-CoV-2/PMMoV)           | 0.47                   | 0.52                   |
| (SARS-CoV-2/PMMoV)/pH        | 0.47                   | 0.52                   |
| (SARS-CoV-2/PMMoV)/TMIN      | 0.50                   | 0.54                   |
| (SARS-CoV-2/PMMoV)/TMAX      | 0.50                   | 0.54                   |
| (SARS-CoV-2/PMMoV)/TAVG      | 0.50                   | 0.54                   |
| (SARS-CoV-2/PMMoV)/TSS       | 0.51                   | 0.54                   |
| (SARS-CoV-2/PMMoV)*pH        | 0.47                   | 0.52                   |
| (SARS-CoV-2/PMMoV)*TMIN      | 0.45                   | 0.50                   |
| (SARS-CoV-2/PMMoV)*TMAX      | 0.45                   | 0.50                   |
| (SARS-CoV-2/PMMoV)*TAVG      | 0.45                   | 0.50                   |
| (SARS-CoV-2/PMMoV)*TSS       | 0.42                   | 0.49                   |
| (SARS-CoV-2/PMMoV)*Flow      | 0.48                   | 0.53                   |
| (SARS-CoV-2/PMMoV)*Flow/pH   | 0.47                   | 0.52                   |
| (SARS-CoV-2/PMMoV)*Flow/TMIN | 0.50                   | 0.54                   |

|                              |      |      |
|------------------------------|------|------|
| (SARS-CoV-2/PMMoV)*Flow/TMAX | 0.50 | 0.54 |
| (SARS-CoV-2/PMMoV)*Flow/TAVG | 0.50 | 0.55 |
| (SARS-CoV-2/PMMoV)*Flow/TSS  | 0.52 | 0.55 |
| (SARS-CoV-2/PMMoV)*Flow*pH   | 0.48 | 0.53 |
| (SARS-CoV-2/PMMoV)*Flow*TMIN | 0.45 | 0.50 |
| (SARS-CoV-2/PMMoV)*Flow*TMAX | 0.45 | 0.50 |
| (SARS-CoV-2/PMMoV)*Flow*TAVG | 0.45 | 0.49 |
| (SARS-CoV-2/PMMoV)*Flow*TSS  | 0.42 | 0.49 |

**Table S7.** Spearman's  $\rho$  correlation coefficients between SARS-CoV-2 N1 and N2 gene concentrations and COVID-19 cases for Oxford WRRF. Significant Spearman's  $\rho$  correlation coefficients are highlighted in gray. Stars (\*) denote when the difference in Spearman's  $\rho$  between unnormalized and normalized SARS-CoV-2 is significant. Table continues to next page.

| Variable                     | N1                     | N2                     |
|------------------------------|------------------------|------------------------|
|                              | 7-Day M. Avg. of Cases | 7-Day M. Avg. of Cases |
| SARS-CoV-2                   | 0.63                   | 0.65                   |
| SARS-CoV-2/pH                | 0.61                   | 0.65                   |
| SARS-CoV-2/TMIN              | 0.67                   | 0.70                   |
| SARS-CoV-2/TMAX              | 0.67                   | 0.70                   |
| SARS-CoV-2/TAVG              | 0.67                   | 0.70                   |
| SARS-CoV-2/TSS               | 0.59                   | 0.60                   |
| SARS-CoV-2*pH                | 0.64                   | 0.64                   |
| SARS-CoV-2*TMIN              | 0.55                   | 0.57                   |
| SARS-CoV-2*TMAX              | 0.57                   | 0.58                   |
| SARS-CoV-2*TAVG              | 0.56                   | 0.57                   |
| SARS-CoV-2*TSS               | 0.63                   | 0.67                   |
| SARS-CoV-2*Flow              | 0.66                   | 0.68                   |
| SARS-CoV-2*Flow/pH           | 0.66                   | 0.68                   |
| SARS-CoV-2*Flow/TMIN         | 0.69                   | 0.71                   |
| SARS-CoV-2*Flow/TMAX         | 0.69                   | 0.71                   |
| SARS-CoV-2*Flow/TAVG         | 0.69                   | 0.71                   |
| SARS-CoV-2*Flow/TSS          | 0.62                   | 0.63                   |
| SARS-CoV-2*Flow*pH           | 0.66                   | 0.68                   |
| SARS-CoV-2*Flow*TMIN         | 0.61                   | 0.63                   |
| SARS-CoV-2*Flow*TMAX         | 0.62                   | 0.64                   |
| SARS-CoV-2*Flow*TAVG         | 0.62                   | 0.64                   |
| SARS-CoV-2*Flow*TSS          | 0.67                   | 0.71                   |
| (SARS-CoV-2/PMMoV)           | 0.35*                  | 0.35*                  |
| (SARS-CoV-2/PMMoV)/pH        | 0.35*                  | 0.35*                  |
| (SARS-CoV-2/PMMoV)/TMIN      | 0.39                   | 0.39*                  |
| (SARS-CoV-2/PMMoV)/TMAX      | 0.38*                  | 0.38*                  |
| (SARS-CoV-2/PMMoV)/TAVG      | 0.39                   | 0.38*                  |
| (SARS-CoV-2/PMMoV)/TSS       | 0.32*                  | 0.32*                  |
| (SARS-CoV-2/PMMoV)*pH        | 0.35*                  | 0.35*                  |
| (SARS-CoV-2/PMMoV)*TMIN      | 0.30*                  | 0.32*                  |
| (SARS-CoV-2/PMMoV)*TMAX      | 0.31*                  | 0.32*                  |
| (SARS-CoV-2/PMMoV)*TAVG      | 0.31*                  | 0.32*                  |
| (SARS-CoV-2/PMMoV)*TSS       | 0.36*                  | 0.37*                  |
| (SARS-CoV-2/PMMoV)*Flow      | 0.38*                  | 0.37*                  |
| (SARS-CoV-2/PMMoV)*Flow/pH   | 0.38*                  | 0.37*                  |
| (SARS-CoV-2/PMMoV)*Flow/TMIN | 0.41                   | 0.40*                  |

|                              |       |       |
|------------------------------|-------|-------|
| (SARS-CoV-2/PMMoV)*Flow/TMAX | 0.41  | 0.40* |
| (SARS-CoV-2/PMMoV)*Flow/TAVG | 0.41  | 0.40* |
| (SARS-CoV-2/PMMoV)*Flow/TSS  | 0.35* | 0.34* |
| (SARS-CoV-2/PMMoV)*Flow*pH   | 0.38* | 0.38* |
| (SARS-CoV-2/PMMoV)*Flow*TMIN | 0.34* | 0.34* |
| (SARS-CoV-2/PMMoV)*Flow*TMAX | 0.35* | 0.35* |
| (SARS-CoV-2/PMMoV)*Flow*TAVG | 0.35* | 0.34* |
| (SARS-CoV-2/PMMoV)*Flow*TSS  | 0.40  | 0.39* |

**Table S8.** Spearman's  $\rho$  correlation coefficients between SARS-CoV-2 N1 and N2 gene concentrations and COVID-19 cases for Tri-Cities NR WTP. Significant Spearman's  $\rho$  correlation coefficients are highlighted in gray. Stars (\*) denote when the difference in Spearman's  $\rho$  between unnormalized and normalized SARS-CoV-2 is significant. Table continues to next page.

| Variable                   | N1                     | N2                     |
|----------------------------|------------------------|------------------------|
|                            | 7-Day M. Avg. of Cases | 7-Day M. Avg. of Cases |
| SARS-CoV-2                 | 0.68                   | 0.68                   |
| SARS-CoV-2/pH              | 0.68                   | 0.67                   |
| SARS-CoV-2/TMIN            | 0.67                   | 0.68                   |
| SARS-CoV-2/TMAX            | 0.67                   | 0.68                   |
| SARS-CoV-2/TAVG            | 0.67                   | 0.68                   |
| SARS-CoV-2/TSS             | 0.66                   | 0.66                   |
| SARS-CoV-2*pH              | 0.68                   | 0.67                   |
| SARS-CoV-2*TMIN            | 0.66                   | 0.65                   |
| SARS-CoV-2*TMAX            | 0.66                   | 0.65                   |
| SARS-CoV-2*TAVG            | 0.66                   | 0.65                   |
| SARS-CoV-2*TSS             | 0.66                   | 0.66                   |
| SARS-CoV-2*Flow            | 0.63                   | 0.63                   |
| SARS-CoV-2*Flow/pH         | 0.63                   | 0.63                   |
| SARS-CoV-2*Flow/TMIN       | 0.61                   | 0.63                   |
| SARS-CoV-2*Flow/TMAX       | 0.61                   | 0.63                   |
| SARS-CoV-2*Flow/TAVG       | 0.61                   | 0.63                   |
| SARS-CoV-2*Flow/TSS        | 0.60                   | 0.62                   |
| SARS-CoV-2*Flow*pH         | 0.63                   | 0.63                   |
| SARS-CoV-2*Flow*TMIN       | 0.63                   | 0.63                   |
| SARS-CoV-2*Flow*TMAX       | 0.63                   | 0.63                   |
| SARS-CoV-2*Flow*TAVG       | 0.63                   | 0.63                   |
| SARS-CoV-2*Flow*TSS        | 0.63                   | 0.64                   |
| (SARS-CoV-2/PMMoV)         | 0.46                   | 0.52                   |
| (SARS-CoV-2/PMMoV)/pH      | -0.07*                 | 0.52                   |
| (SARS-CoV-2/PMMoV)/TMIN    | -0.09*                 | 0.53                   |
| (SARS-CoV-2/PMMoV)/TMAX    | -0.09*                 | 0.53                   |
| (SARS-CoV-2/PMMoV)/TAVG    | -0.09*                 | 0.53                   |
| (SARS-CoV-2/PMMoV)/TSS     | -0.07*                 | 0.52                   |
| (SARS-CoV-2/PMMoV)*pH      | 0.46                   | 0.52                   |
| (SARS-CoV-2/PMMoV)*TMIN    | 0.45*                  | 0.51                   |
| (SARS-CoV-2/PMMoV)*TMAX    | 0.45*                  | 0.51                   |
| (SARS-CoV-2/PMMoV)*TAVG    | 0.45*                  | 0.51                   |
| (SARS-CoV-2/PMMoV)*TSS     | 0.45*                  | 0.51                   |
| (SARS-CoV-2/PMMoV)*Flow    | 0.43*                  | 0.50                   |
| (SARS-CoV-2/PMMoV)*Flow/pH | 0.43*                  | 0.50                   |

|                              |       |      |
|------------------------------|-------|------|
| (SARS-CoV-2/PMMoV)*Flow/TMIN | 0.43* | 0.49 |
| (SARS-CoV-2/PMMoV)*Flow/TMAX | 0.43* | 0.49 |
| (SARS-CoV-2/PMMoV)*Flow/TAVG | 0.43* | 0.49 |
| (SARS-CoV-2/PMMoV)*Flow/TSS  | 0.42* | 0.49 |
| (SARS-CoV-2/PMMoV)*Flow*pH   | 0.43* | 0.50 |
| (SARS-CoV-2/PMMoV)*Flow*TMIN | 0.42* | 0.49 |
| (SARS-CoV-2/PMMoV)*Flow*TMAX | 0.42* | 0.49 |
| (SARS-CoV-2/PMMoV)*Flow*TAVG | 0.42* | 0.49 |
| (SARS-CoV-2/PMMoV)*Flow*TSS  | 0.43* | 0.49 |



**Table S9.** Spearman's  $\rho$  correlation coefficients between SARS-CoV-2 N1, N2, and E gene concentrations and COVID-19 cases for The Ohio State University on-campus residents. Significant Spearman's  $\rho$  correlation coefficients are highlighted in gray. Stars (\*) denotes significant increase in Spearman's  $\rho$  from unnormalized to normalized SARS-CoV-2. Table continues to next page.

| Variable                   | N1    | N2    | E     |
|----------------------------|-------|-------|-------|
| SARS-CoV-2                 | 0.43  | 0.45  | 0.43  |
| SARS-CoV-2/Turbidity       | 0.53  | 0.38  | 0.55  |
| SARS-CoV-2/TSS             | 0.53  | 0.40  | 0.53  |
| SARS-CoV-2/DOC             | 0.43  | 0.35  | 0.39  |
| SARS-CoV-2/Total Coliforms | 0.35  | 0.40  | 0.30  |
| SARS-CoV-2/ <i>E. coli</i> | 0.25  | 0.30  | 0.32  |
| SARS-CoV-2/Temperature     | 0.50  | 0.51  | 0.50  |
| SARS-CoV-2/pH              | 0.50  | 0.51  | 0.50  |
| SARS-CoV-2/mV_pH           | 0.18  | 0.05  | 0.27  |
| SARS-CoV-2/ORP_mV          | 0.15  | 0.07  | 0.07  |
| SARS-CoV-2/EC              | 0.55  | 0.55  | 0.57  |
| SARS-CoV-2/EC_Abs          | 0.55  | 0.55  | 0.50  |
| SARS-CoV-2/Resistivity     | 0.43  | 0.43  | 0.47  |
| SARS-CoV-2/Pressure        | 0.50  | 0.52  | 0.50  |
| SARS-CoV-2*Turbidity       | 0.34  | 0.42  | 0.31  |
| SARS-CoV-2*TSS             | 0.27  | 0.34  | 0.23  |
| SARS-CoV-2*DOC             | 0.44  | 0.40  | 0.40  |
| SARS-CoV-2*Total Coliforms | 0.29  | 0.38  | 0.27  |
| SARS-CoV-2* <i>E. coli</i> | 0.22  | 0.16  | 0.21  |
| SARS-CoV-2*Temperature     | 0.50  | 0.55  | 0.55  |
| SARS-CoV-2*pH              | 0.50  | 0.54  | 0.50  |
| SARS-CoV-2*mV_pH           | -0.46 | -0.48 | -0.38 |
| SARS-CoV-2*ORP_mV          | 0.32  | 0.31  | 0.31  |
| SARS-CoV-2*EC              | 0.43  | 0.43  | 0.47  |
| SARS-CoV-2*EC_Abs          | 0.43  | 0.40  | 0.47  |
| SARS-CoV-2*Resistivity     | 0.55  | 0.55  | 0.57  |
| SARS-CoV-2*Pressure        | 0.50  | 0.52  | 0.50  |
| SARS-CoV-2/(E2:E3)         | 0.55  | 0.67  | 0.63  |
| SARS-CoV-2/(aE2:E4)        | 0.55  | 0.67  | 0.55  |
| SARS-CoV-2/(bE2:E4)        | 0.55  | 0.67  | 0.55  |
| SARS-CoV-2/(cE2:E4)        | 0.50  | 0.67  | 0.55  |
| SARS-CoV-2/(aE4:E6)        | 0.42  | 0.45  | 0.42  |
| SARS-CoV-2/(bE4:E6)        | 0.53  | 0.46  | 0.46  |
| SARS-CoV-2/(cE4:E6)        | 0.48  | 0.41  | 0.47  |
| SARS-CoV-2/(dE4:E6)        | 0.44  | 0.47  | 0.48  |
| SARS-CoV-2/SUVA254         | 0.63  | 0.63  | 0.68  |
| SARS-CoV-2/SUVA280         | 0.63  | 0.63  | 0.77  |
| SARS-CoV-2/SUVA400         | 0.50  | 0.45  | 0.51  |

|                     |      |      |      |
|---------------------|------|------|------|
| SARS-CoV-2*(E2:E3)  | 0.65 | 0.70 | 0.70 |
| SARS-CoV-2*(aE2:E4) | 0.65 | 0.68 | 0.70 |
| SARS-CoV-2*(bE2:E4) | 0.65 | 0.68 | 0.70 |
| SARS-CoV-2*(cE2:E4) | 0.67 | 0.75 | 0.77 |
| SARS-CoV-2*(aE4:E6) | 0.42 | 0.42 | 0.44 |
| SARS-CoV-2*(bE4:E6) | 0.32 | 0.33 | 0.36 |
| SARS-CoV-2*(cE4:E6) | 0.31 | 0.41 | 0.37 |
| SARS-CoV-2*(dE4:E6) | 0.35 | 0.35 | 0.40 |
| SARS-CoV-2*SUVA254  | 0.50 | 0.50 | 0.52 |
| SARS-CoV-2*SUVA280  | 0.50 | 0.50 | 0.52 |
| SARS-CoV-2*SUVA400  | 0.27 | 0.24 | 0.27 |

**Table S10.** Spearman's  $\rho$  correlation coefficients between SARS-CoV-2 N1, N2, and E gene concentrations normalized by PMMoV and COVID-19 cases for The Ohio State University on-campus residents. Significant Spearman's  $\rho$  correlation coefficients are highlighted in gray. Stars (\*) denotes significant increase in Spearman's  $\rho$  from unnormalized to normalized SARS-CoV-2. Table continues to next page.

| Variable                           | N1    | N2    | E     |
|------------------------------------|-------|-------|-------|
| SARS-CoV-2                         | 0.43  | 0.45  | 0.43  |
| (SARS-CoV-2/PMMoV)                 | 0.63  | 0.66  | 0.62  |
| (SARS-CoV-2/PMMoV)/Turbidity       | 0.60  | 0.58  | 0.62  |
| (SARS-CoV-2/PMMoV)/TSS             | 0.64  | 0.65  | 0.65  |
| (SARS-CoV-2/PMMoV)/DOC             | 0.52  | 0.57  | 0.59  |
| (SARS-CoV-2/PMMoV)/Total Coliforms | 0.49  | 0.35  | 0.46  |
| (SARS-CoV-2/PMMoV)/ <i>E. coli</i> | 0.34  | 0.23  | 0.19  |
| (SARS-CoV-2/PMMoV)/Temperature     | 0.55  | 0.56  | 0.58  |
| (SARS-CoV-2/PMMoV)/pH              | 0.60  | 0.57  | 0.63  |
| (SARS-CoV-2/PMMoV)/mV_pH           | 0.00  | 0.02  | 0.06  |
| (SARS-CoV-2/PMMoV)/ORP_mV          | 0.14  | 0.08  | 0.07  |
| (SARS-CoV-2/PMMoV)/EC              | 0.55  | 0.57  | 0.52  |
| (SARS-CoV-2/PMMoV)/EC_Abs          | 0.55  | 0.53  | 0.52  |
| (SARS-CoV-2/PMMoV)/Resistivity     | 0.59  | 0.62  | 0.61  |
| (SARS-CoV-2/PMMoV)/Pressure        | 0.62  | 0.57  | 0.63  |
| (SARS-CoV-2/PMMoV)*Turbidity       | 0.52  | 0.60  | 0.46  |
| (SARS-CoV-2/PMMoV)*TSS             | 0.50  | 0.58  | 0.53  |
| (SARS-CoV-2/PMMoV)*DOC             | 0.57  | 0.61  | 0.51  |
| (SARS-CoV-2/PMMoV)*Total Coliforms | 0.47  | 0.56  | 0.58  |
| (SARS-CoV-2/PMMoV)* <i>E. coli</i> | 0.45  | 0.39  | 0.41  |
| (SARS-CoV-2/PMMoV)*Temperature     | 0.62  | 0.67  | 0.63  |
| (SARS-CoV-2/PMMoV)*pH              | 0.61  | 0.62  | 0.63  |
| (SARS-CoV-2/PMMoV)*mV_pH           | -0.57 | -0.57 | -0.44 |
| (SARS-CoV-2/PMMoV)*ORP_mV          | 0.41  | 0.41  | 0.40  |
| (SARS-CoV-2/PMMoV)*EC              | 0.59  | 0.62  | 0.61  |
| (SARS-CoV-2/PMMoV)*EC_Abs          | 0.59  | 0.66  | 0.61  |
| (SARS-CoV-2/PMMoV)*Resistivity     | 0.55  | 0.57  | 0.52  |
| (SARS-CoV-2/PMMoV)*Pressure        | 0.62  | 0.57  | 0.63  |
| (SARS-CoV-2/PMMoV)/(E2:E3)         | 0.47  | 0.68  | 0.62  |
| (SARS-CoV-2/PMMoV)/(aE2:E4)        | 0.47  | 0.70  | 0.60  |
| (SARS-CoV-2/PMMoV)/(bE2:E4)        | 0.65  | 0.70  | 0.68  |
| (SARS-CoV-2/PMMoV)/(cE2:E4)        | 0.47  | 0.70  | 0.55  |
| (SARS-CoV-2/PMMoV)/(aE4:E6)        | 0.60  | 0.65  | 0.61  |
| (SARS-CoV-2/PMMoV)/(bE4:E6)        | 0.68  | 0.66  | 0.63  |
| (SARS-CoV-2/PMMoV)/(cE4:E6)        | 0.64  | 0.64  | 0.65  |
| (SARS-CoV-2/PMMoV)/(dE4:E6)        | 0.62  | 0.65  | 0.64  |
| (SARS-CoV-2/PMMoV)/SUVA254         | 0.68  | 0.68  | 0.75  |
| (SARS-CoV-2/PMMoV)/SUVA280         | 0.68  | 0.68  | 0.75  |

|                             |      |      |      |
|-----------------------------|------|------|------|
| (SARS-CoV-2/PMMoV)/SUVA400  | 0.68 | 0.68 | 0.61 |
| (SARS-CoV-2/PMMoV)*(E2:E3)  | 0.70 | 0.75 | 0.73 |
| (SARS-CoV-2/PMMoV)*(aE2:E4) | 0.70 | 0.75 | 0.77 |
| (SARS-CoV-2/PMMoV)*(bE2:E4) | 0.62 | 0.65 | 0.67 |
| (SARS-CoV-2/PMMoV)*(cE2:E4) | 0.77 | 0.73 | 0.75 |
| (SARS-CoV-2/PMMoV)*(aE4:E6) | 0.64 | 0.64 | 0.59 |
| (SARS-CoV-2/PMMoV)*(bE4:E6) | 0.57 | 0.61 | 0.55 |
| (SARS-CoV-2/PMMoV)*(cE4:E6) | 0.62 | 0.61 | 0.54 |
| (SARS-CoV-2/PMMoV)*(dE4:E6) | 0.62 | 0.64 | 0.59 |
| (SARS-CoV-2/PMMoV)*SUVA254  | 0.67 | 0.67 | 0.58 |
| (SARS-CoV-2/PMMoV)*SUVA280  | 0.65 | 0.65 | 0.58 |
| (SARS-CoV-2/PMMoV)*SUVA400  | 0.55 | 0.55 | 0.53 |
